# Supplementary material
Source: Research Square preprint supplement (doi:10.21203/rs.3.rs-9744860/v1)
Supplement: Supplementary file 1 [file 48364f9744812b226fd43b9c.pdf]

## Themes for Directed Content Analysis related to 'Recommended use of methods':

**Example with accelerometer. This was done for all listed tools:** Accelerometer, GPS, Systematic observations group-level, Systematic observations individual-level, Behavioral mapping, Camera observations, Survey.

Accelerometer, 0-2 years, supporting  
Accelerometer, 0-2 years, contradicting  
Accelerometer, 3-5 years, supporting  
Accelerometer, 3-5 years, contradicting  
Accelerometer, 6-12 years, supporting  
Accelerometer, 6-12 years, contradicting  
Accelerometer, 13-18 years, supporting  
Accelerometer, 13-18 years, contradicting

Accelerometer, POS, supporting  
Accelerometer, POS, contradicting  
Accelerometer, School, supporting  
Accelerometer, School, contradicting  
Accelerometer, ECEC, supporting  
Accelerometer, ECEC, contradicting  
Accelerometer, Housing association, supporting  
Accelerometer, Housing association, contradicting  
Accelerometer, Play Street, supporting  
Accelerometer, Play Street, contradicting  
Accelerometer, Healthcare, supporting  
Accelerometer, Healthcare, contradicting  
Accelerometer, other settings, supporting  
Accelerometer, other settings, contradicting

Accelerometer, PA intensity, supporting  
Accelerometer, PA intensity, contradicting  
Accelerometer, Activity type, supporting  
Accelerometer, Activity type, contradicting  
Accelerometer, Play volume, supporting  
Accelerometer, Play volume, contradicting  
Accelerometer, Frequency, supporting  
Accelerometer, Frequency, contradicting  
Accelerometer, Time spent in outdoor space, supporting  
Accelerometer, Time spent in outdoor space, contradicting  
Accelerometer, Number of users, supporting  
Accelerometer, Number of users, contradicting  
Accelerometer, Number of unique users, supporting  
Accelerometer, Number of unique users, contradicting  
Accelerometer, social interaction, supporting  
Accelerometer, social interaction, contradicting  
Accelerometer, other outcomes, supporting  
Accelerometer, other outcomes, contradicting
